# Supplementary figures and images for: Feeding height stratification among the herbivorous dinosaurs from the Dinosaur Park Formation (upper Campanian) of Alberta, Canada
Source: Springer Nature journal article supplement (doi:10.1186/1472-6785-13-14), 2013-01-01

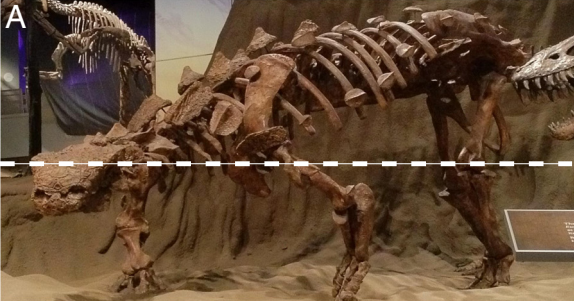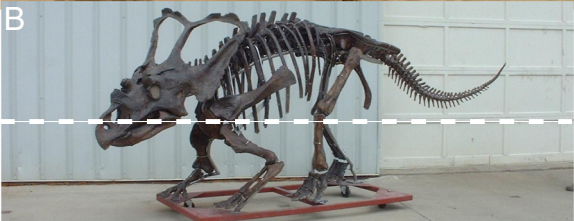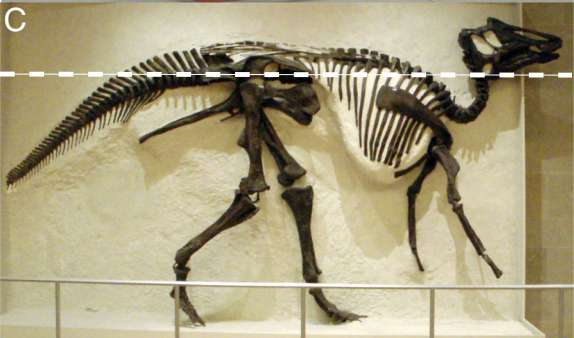

Supplement: 12898_2012_230_MOESM3_ESM.pdf [file 12898_2012_230_MOESM3_ESM.pdf]

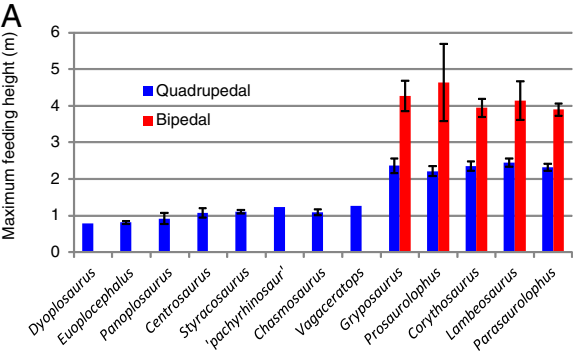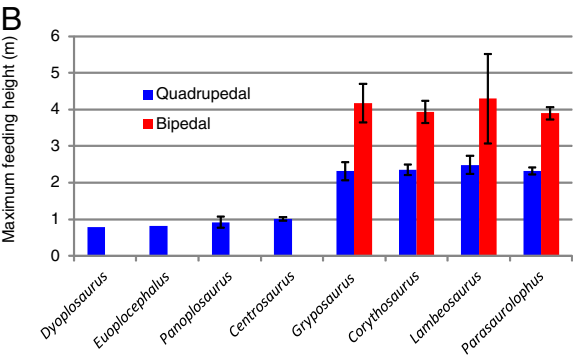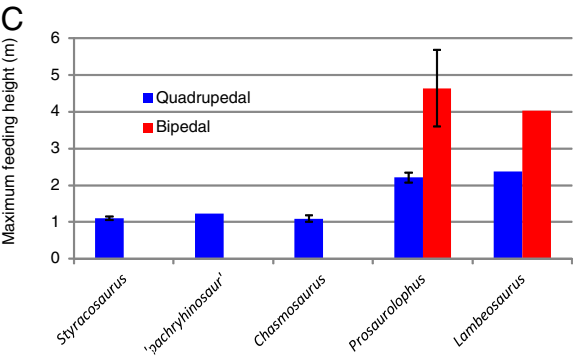

Supplement: 12898_2012_230_MOESM5_ESM.pdf [file 12898_2012_230_MOESM5_ESM.pdf]
